# Supplementary material for: Gas-phase conformational preference of the smallest saccharide (glycolaldehyde) and its hydrated complexes with bridged hydrogen bonding
Source: Royal Society of Chemistry journal article supplement (doi:10.1039/c6ra26965f), 2017-01-01
Supplement: c6ra26965f1.pdf [file c6ra26965f1.pdf]

## Supporting Information

**S1 Table 1.** Boltzmann Distributions of the hydrated GA conformers and relative Gibbs free energies (kJ mol<sup>-1</sup>)

| Calculated conformer | $\Delta G^a$ | %    | $\Delta G^b$ | %    |
|----------------------|--------------|------|--------------|------|
| CC-W-1               | 0            | 72.5 | 0            | 72.9 |
| CC-W-2               | 1.18         | 15.1 | 1.26         | 14.8 |
| CC-W-3               | 2.93         | 8.3  | 3.12         | 8.4  |
| CC-W-4               | 4.21         | 4.0  | 4.96         | 3.9  |
| TG-W-5               | 10.8         | 0.9  | 11.32        | 0.8  |
| TG-W-6               | 12.9         | 0    | 12.83        | 0    |
| TT-W-7               | 13.2         | 0    | 13.4         | 0    |
| TT-W-8               | 19.3         | 0    | 18.86        | 0    |
| CT-W-9               | 25.3         | 0    | 24.2         | 0    |

Gibbs free energy values were estimated according to  $\Delta G = -RT \ln K$ . Calculated from  $\Delta G$  with a temperature of 298 K.  $\Delta G^a$  obtained at  $\omega$ B97X-D/cc-pVTZ and  $\Delta G^b$  calculated at MP2/6-311+g(d,p) level with the G09W program package.
